# Supplementary material
Source: publisher site journal article supplement (https://www.dovepress.com/article/562499)
Supplement: Supplementary file 1 [file 562499_Supplementary%20Materials.pdf]

## Supplementary Materials

**Supplementary Table 1.** Approving Institutional Review Boards or Independent Ethics Committees

| Study Center                                | IRB/EC Name/Address                                                                                                                                                                                                                                                                                                                                | IRB/EC Chairperson                |
|---------------------------------------------|----------------------------------------------------------------------------------------------------------------------------------------------------------------------------------------------------------------------------------------------------------------------------------------------------------------------------------------------------|-----------------------------------|
| 1000-1009<br>1011-1019                      | Copernicus Group IRB / 5000<br>Centregreen Way Suite 200,<br>Cary, NC 27513, USA                                                                                                                                                                                                                                                                   | Glenn Veit                        |
| 2001, 2002<br>2005-2007<br>2009, 2011, 2012 | Bulgarian Drug Agency /<br>Ethics Committee for<br>Multicenter Trials / 8<br>“Damyan Gruev” Str., fl. 1,<br>room 104, Sofia 1303,<br>Bulgaria                                                                                                                                                                                                      | Dr. Todor Popov                   |
| 4000                                        | LEC at MSc Scientific<br>Research Inst. of Psychiatry /<br>Ethical Council at the MoH<br>of RF<br>/ IEC of Federal State<br>Budgetary Institution<br>"Moscow Scientific and<br>Research Institute of<br>Psychiatry" of the Ministry of<br>Healthcare of the Russian<br>Federation, 3, building 10,<br>Poteshnaya street, Moscow,<br>107076, Russia | Ya. Gurovich                      |
| 4001                                        | IEC "Tomsk Clinical<br>Psychiatric Hospital" /<br>Ethical Council at the MoH<br>of RF / 5 Kooperativny<br>Street, Tomsk, Russian<br>Federation                                                                                                                                                                                                     | Elena Vladimirovna<br>Gutkevich   |
| 4002                                        | LEC Mental Health Research<br>Center / Ethical Council at<br>the MoH of RF / 34,<br>Kashirskoye shosse, 115522,<br>Moscow, Russian Federation                                                                                                                                                                                                      | Elena Vladimirovna<br>Kolyutskaya |
| 4003                                        | LEC of SPBSHI "Psychiatric<br>Hospital #1 n.a.<br>P.P.Kaschenko" / Ethical<br>Council at the MoH of RF /<br>IEC of Saint Petersburg State                                                                                                                                                                                                          | Natalia Vladimirovna<br>Semenova  |

|                         |                                                                                                                                                                                                  |                                                                                |
|-------------------------|--------------------------------------------------------------------------------------------------------------------------------------------------------------------------------------------------|--------------------------------------------------------------------------------|
|                         | Budgetary Institution of Healthcare "Psychiatric Hospital # 1 named after P.P. Kashchenko"; 10, Menkovskaya street, settlement Nikolskoe, Gatchinskiy district, Leningrad region, 188357, Russia |                                                                                |
| 4004-4007<br>4009, 4010 | LEC at SPB SR Psychoneurological Inst. n.a.V.M.Bekhterev of MoH / Ethical Council at the MoH of RF / Bekhtereva Street 3, 192019 St. Petersburg, Russia                                          | Aleksandra Alekseyevna Burma (16-Jul-2013)<br><br>N. V. Semenova (21-Sep-2017) |
| 4008                    | EC of the SBHI "Sverdlovsk Regional Clinical Psychiatric Hospital" / Ethical Council at the MoH of RF / Ulitsa Roshchinskaya, 72, Yekaterinburg, Sverdlovskaya oblast', 620023, Russia           | E. Iu. Dunaeva                                                                 |
| 4011                    | LEC at Msc Scientific Research Inst. of Psychiatry / Ethical Council at the MoH of RF/ Bekhtereva Street 3, 192019 St. Petersburg, Russia                                                        | Aleksandra Alekseyevna Burma (16-Jul-2013)<br><br>N. V. Semenova (21-Sep-2017) |
| 4012                    | EC at SBHI "Samara Psychiatric Hospital" / Ethical Council at the MoH of RF / Ulitsa Nagornaya, 78, Samara, Samarskaya oblast, 443016, Russia                                                    | Vladimir Nikolayevich VOSTOKIN                                                 |
| 4013                    | LEC at SHI "Psychiatric hospital #1 n. a. N.A. Alexeev" / Ethical Council at the MoH of RF/ Bekhtereva Street 3, 192019 St. Petersburg, Russia                                                   | Aleksandra Alekseyevna Burma (16-Jul-2013)<br>N. V. Semenova (21-Sep-2017)     |
| 4014                    | IEC at "Arte Med Assistance" LLC / IEC at "Arte Med Assistance" LLC , 27, building C, office 44, prospect Engel'sa, St. Petersburg, 194156, Russia                                               | Prof. B. V. Andreev                                                            |

|            |                                                                                                                                                                                                    |                                  |
|------------|----------------------------------------------------------------------------------------------------------------------------------------------------------------------------------------------------|----------------------------------|
| 5001       | State Expert Center of the Ministry of Health of Ukraine / LEC CI Kherson Regional Psychiatric Hospital / Off . 601, 40, K. Ushinsky Str., Kyiv, 03151, Ukraine                                    | S. A. Yerokhin                   |
| 5002, 5009 | State Expert Center of the Ministry of Health of Ukraine / LEC State Institution Institute of Neurology, Psychiatry and Narcology of NAMSU / Off . 601, 40, K. Ushinsky Str., Kyiv, 03151, Ukraine | Liudmyla Mykolayivna Tantsura    |
| 5003       | State Expert Center of the Ministry of Health of Ukraine / LEC Odesa Regional Psych. Dispensary / Off . 601, 40, K. Ushinsky Str., Kyiv, 03151, Ukraine                                            | N.B. Verevka                     |
| 5004, 5010 | State Expert Center of the Ministry of Health of Ukraine / LEC CI" Lviv Regional Clinical Psychiatric Hospital" / Off . 601, 40, K. Ushinsky Str., Kyiv, 03151, Ukraine                            | O. R. Lemishko                   |
| 5005       | State Expert Center of the Ministry of Health of Ukraine / LEC CI Vinnytsya Regional Psychoneurological Hospital named after O.Yuschenko / Off . 601, 40, K. Ushinsky Str., Kyiv, 03151, Ukraine   | Yu.P. Lytvynenko                 |
| 5006       | State Expert Center of the Ministry of Health of Ukraine / LEC CI Cherkasy Reg.Psych.Hospital / Off . 601, 40, K. Ushinsky Str., Kyiv, 03151, Ukraine                                              | V.I. Shevchuk                    |
| 5007       | State Expert Center of the Ministry of Health of Ukraine / LEC Kharkiv Reg.Clin.Psych.Hosp.#3 / Off . 601, 40, K. Ushinsky Str., Kyiv, 03151, Ukraine                                              | Kostiantyn Valeriyovych Kosterev |

|            |                                                                                                                                                                                                    |                                  |
|------------|----------------------------------------------------------------------------------------------------------------------------------------------------------------------------------------------------|----------------------------------|
| 5008       | State Expert Center of the Ministry of Health of Ukraine / LEC City Clinical Psychoneurological Hospital #1 / Off . 601, 40, K. Ushinsky Str., Kyiv, 03151, Ukraine                                | M. Yu. Ignatov                   |
| 5011       | State Expert Center of the Ministry of Health of Ukraine / LEC Ternopil Reg.Com. Clinical Psychoneurological Hospital / Off . 601, 40, K. Ushinsky Str., Kyiv, 03151, Ukraine                      | O.M. Bondarenko                  |
| 5012       | State Expert Center of the Ministry of Health of Ukraine / LEC State Institution Institute of Neurology, Psychiatry and Narcology of NAMSU / Off . 601, 40, K. Ushinsky Str., Kyiv, 03151, Ukraine | Kostiantyn Valeriyovych Kosterev |
| 6000       | Ethics Committee of Institute of Mental Health/ Palmotićeva 37, 11000 Belgrade, Serbia                                                                                                             | Dr. Nenad Rudic                  |
| 6001       | Ethics Committee of Clinical Center Dragisa Misovic/Heroja Milana Tepica 1 11000 Belgrade, Serbia                                                                                                  | Dr. Biljana Pencic Popovic       |
| 6002       | Ethics Committee of Clinical Center Serbia / Pasterova 2 11000 Belgrade, Serbia                                                                                                                    | Dr. Branislav Stefanovic         |
| 6003, 6007 | Ethics Committee of Clinical Center Kragujevac / Zmaj Jovina 30, 34000 Kragujevac, Serbia                                                                                                          | Dr. Dejana Ruzic Zecevic         |
| 6005       | Ethics Committee of Clinical Center of Vojvodina / Hajduk Veljka 1, 21137 Novi Sad, Vojvodina                                                                                                      | Dr. Edita Stokic                 |

**Supplementary Table 2.** Clinician-Rated Clinical Global Impression-Severity and CGI-Improvement scales

| CGI-S                       | CGI-I                  |
|-----------------------------|------------------------|
| 1="Normal, not at all ill"  | 1="Very much improved" |
| 2="Borderline mentally ill" | 2="Much improved"      |
| 3="Mildly ill"              | 3="Minimally improved" |
| 4="Moderately ill"          | 4="No change"          |
| 5="Markedly ill"            | 5="Minimally worse"    |
| 6="Severely ill"            | 6="Much worse"         |
| 7="The most extremely ill"  | 7="Very much worse"    |

CGI-I, Clinician-Rated Clinical Global Impression-Improvement; CGI-S, Clinician-Rated Clinical Global Impression-Severity; PANSS, Positive and Negative Syndrome Scale.

**Supplementary Table 3.** Correlation Between PANSS Total Score and CGI Scores

| PANSS Score                                               | N   | Pearson Correlation Coefficient | Spearman Correlation Coefficient |
|-----------------------------------------------------------|-----|---------------------------------|----------------------------------|
| Total score                                               | 615 | CGI-S: 0.53                     | CGI-S: 0.50                      |
| Change from baseline                                      | 497 | CGI-S: 0.72                     | CGI-S: 0.73                      |
|                                                           |     | CGI-I: 0.81                     | CGI-I: 0.80                      |
| Percentage change in unadjusted PANSS Score from baseline | 497 | CGI-S: 0.78                     | CGI-S: 0.79                      |
|                                                           |     | CGI-I: 0.82                     | CGI-I: 0.82                      |

All *P*-values are <.0001. CGI-I, Clinician-Rated Clinical Global Impression-Improvement; CGI-S, Clinician-Rated Clinical Global Impression-Severity; PANSS, Positive and Negative Syndrome Scale; SD, standard deviation.

**Supplementary Table 4. MSD and MSRs for Change From Baseline to Week 6 in PANSS**

Total Score by CGI-S at Baseline for Responders

| CGI-S at baseline           | n   | Mean (SD)         | 10th Percentile | 25th Percentile | 50th Percentile | 75th Percentile | 90th Percentile |
|-----------------------------|-----|-------------------|-----------------|-----------------|-----------------|-----------------|-----------------|
| All Responders <sup>a</sup> | 393 | -26.23<br>(11.17) | -41             | -33             | -26             | -18             | -12             |
| 4="Moderately ill"          | 85  | -25.6<br>(10.43)  | -39             | -32             | -24             | -19             | -12             |
| 5="Markedly ill"            | 261 | -25.74<br>(10.94) | -41             | -33             | -26             | -18             | -11             |
| 6="Severely ill"            | 47  | -30.04<br>(13.10) | -51             | -41             | -30             | -20             | -14             |

Shading indicates the MSRs.

<sup>a</sup>Responders are defined as CGI-I scores of 1, 2, or 3.

MSD is defined as change in PANSS total score from baseline to endpoint for at least 50% of responders (CGI-I=1, 2, 3).

CGI-I, Clinician-Rated Clinical Global Impression-Improvement; CGI-S, Clinician-Rated Clinical Global Impression-Severity; MSD, meaningful score difference; MSRs, meaningful score regions; PANSS, Positive and Negative Syndrome Scale; SD, standard deviation.

**Supplementary Table 5.** MSD and MSRs for Percentage Change From Baseline to Week 6 in PANSS Total Score (Unadjusted) by CGI-S at Baseline for Responders

| CGI-S at baseline           | n   | Mean (SD)         | 10th Percentile | 25th Percentile | 50th Percentile | 75th Percentile | 90th Percentile |
|-----------------------------|-----|-------------------|-----------------|-----------------|-----------------|-----------------|-----------------|
| All responders <sup>a</sup> | 393 | -27.26<br>(11.50) | -42.4           | -34.7           | -26.4           | -18.6           | -12.8           |
| 4=“Moderately ill”          | 85  | -28.57<br>(11.29) | -43.6           | -34.4           | -27.8           | -21.4           | -14.0           |
| 5=“Markedly ill”            | 261 | -26.94<br>(11.64) | -42.2           | -34.7           | -26.0           | -18.0           | -12.2           |
| 6=“Severely ill”            | 47  | -26.66<br>(11.15) | -42.1           | -36.4           | -25.7           | -18.9           | -11.9           |

Shading indicates the MSRs.

<sup>a</sup>Responders are defined as CGI-I scores of 1, 2, or 3.

MSD defined as the percentage change in PANSS total score from baseline to endpoint for at least 50% of responders (CGI-I=1, 2, 3).

CGI-I, Clinician-Rated Clinical Global Impression-Improvement; CGI-S, Clinician-Rated Clinical Global Impression-Severity; MSD, meaningful score difference; MSRs, meaningful score regions; PANSS, Positive and Negative Syndrome Scale; SD, standard deviation.

**Supplementary Table 6.** MSD and MSRs for Percentage Change From Baseline to Week 6 in PANSS Total Score (Adjusted) by CGI-S at Baseline for Responders (CGI-I=1, 2)

| CGI-S at baseline           | n   | Mean (SD)         | 10th Percentile | 25th Percentile | 50th Percentile | 75th Percentile | 90th Percentile |
|-----------------------------|-----|-------------------|-----------------|-----------------|-----------------|-----------------|-----------------|
| All responders <sup>a</sup> | 257 | -47.35<br>(14.75) | -66.1           | -56.5           | -46.5           | -37.0           | -29.0           |
| 4=“Moderately ill”          | 60  | -49.39<br>(15.10) | -71.7           | -57.7           | -46.5           | -38.8           | -34.2           |
| 5=“Markedly ill”            | 171 | -47.16<br>(14.93) | -65.5           | -56.5           | -46.6           | -37.0           | -28.4           |
| 6=“Severely ill”            | 26  | -43.85<br>(12.30) | -59.1           | -54.8           | -40.6           | -34.2           | -28.3           |

<sup>a</sup>Responders are defined as CGI-I scores of 1 or 2.

MSD is defined as percentage change in PANSS total score from baseline to endpoint for at least 50% of responders (CGI-I=1, 2).

CGI-I, Clinician-Rated Clinical Global Impression-Improvement; CGI-S, Clinician-Rated Clinical Global Impression-Severity; MSD, meaningful score difference; MSRs, meaningful score regions; PANSS, Positive and Negative Syndrome Scale; SD, standard deviation.

**Supplementary Table 7.** MSD and MSRs for Percentage Change From Baseline to Week 6 in PANSS Total Score (Adjusted) by CGI-S at Baseline for Responders (CGI-I=1, 2, 3)

| <b>CGI-S at baseline</b>    | <b>n</b> | <b>Mean (SD)</b>  | <b>10th Percentile</b> | <b>25th Percentile</b> | <b>50th Percentile</b> | <b>75th Percentile</b> | <b>90th Percentile</b> |
|-----------------------------|----------|-------------------|------------------------|------------------------|------------------------|------------------------|------------------------|
| All responders <sup>a</sup> | 393      | -39.88<br>(17.13) | -62.3                  | -51.0                  | -38.6                  | -27.1                  | -18.2                  |
| 4="Moderately ill"          | 85       | -43.08<br>(16.92) | -65.5                  | -51.7                  | -43.1                  | -32.3                  | -21.2                  |
| 5="Markedly ill"            | 261      | -39.45<br>(17.42) | -62.3                  | -51.0                  | -38.4                  | -26.0                  | -17.5                  |
| 6="Severely ill"            | 47       | -36.47<br>(15.19) | -58.7                  | -50.0                  | -35.6                  | -26.3                  | -15.9                  |

<sup>a</sup>Responders are defined as CGI-I scores of 1, 2, or 3.

MSD is defined as percentage change in PANSS total score from baseline to endpoint for at least 50% of responders (CGI-I=1, 2, 3).

CGI-I, Clinician-Rated Clinical Global Impression-Improvement; CGI-S, Clinician-Rated Clinical Global Impression-Severity; MSD, meaningful score difference; MSRs, meaningful score regions; PANSS, Positive and Negative Syndrome Scale; SD, standard deviation.

**Supplementary Figure 1.** Relationship between PANSS total score (unadjusted) and CGI at baseline (A) and Week 6 (B)

**A.**

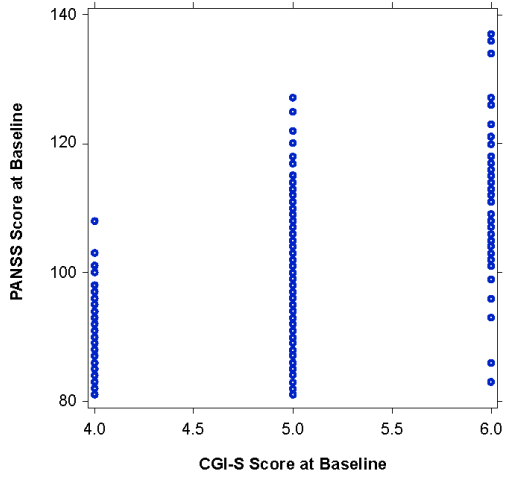

**B.**

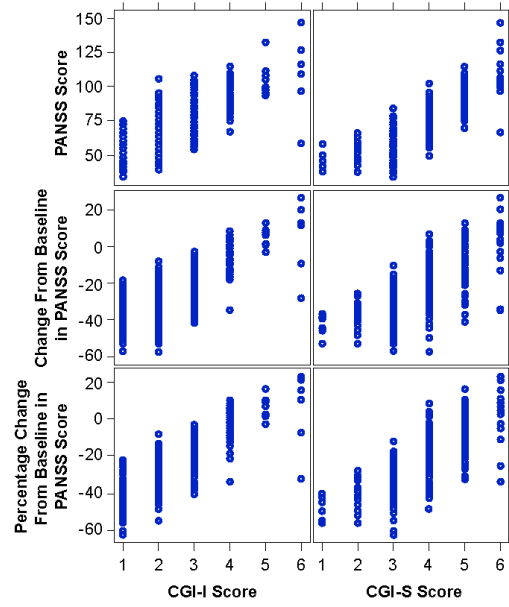

**Supplementary Figure 2.** Change in PANSS total score from baseline to Week 6 for responders<sup>a</sup> (A) overall and (B) by baseline CGI-S

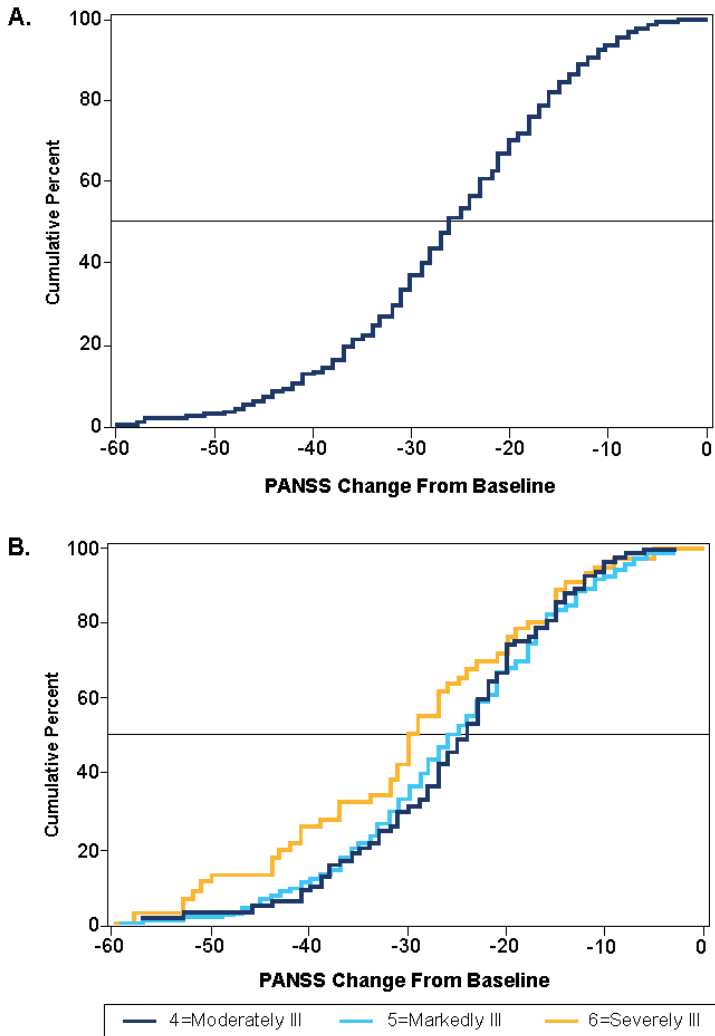

<sup>a</sup>Responders are defined as CGI-I scores of 1, 2, or 3.

CGI-I, Clinician-Rated Clinical Global Impression-Improvement; CGI-S, Clinician-Rated Clinical Global Impression-Severity; PANSS, Positive and Negative Syndrome Scale.

**Supplementary Figure 3.** Percentage change in PANSS total score (unadjusted) from baseline to Week 6 for responders<sup>a</sup> (A) overall and (B) by baseline CGI-S

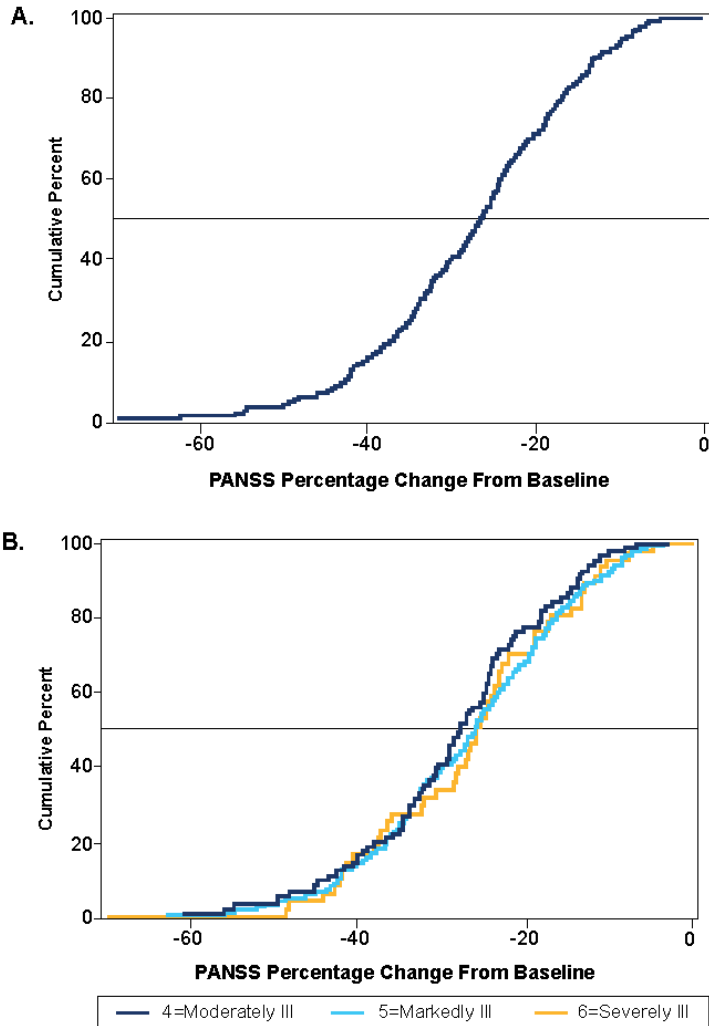

<sup>a</sup>Responders are defined as CGI-I scores of 1, 2, or 3.  
CGI-I, Clinician-Rated Clinical Global Impression-Improvement; CGI-S, Clinician-Rated Clinical Global Impression-Severity; PANSS, Positive and Negative Syndrome Scale.

**Supplementary Figure 4.** Meaningful regions of change and percentage change (unadjusted) in PANSS total score corresponding to severity at baseline for responders (CGI-I=1, 2, 3)

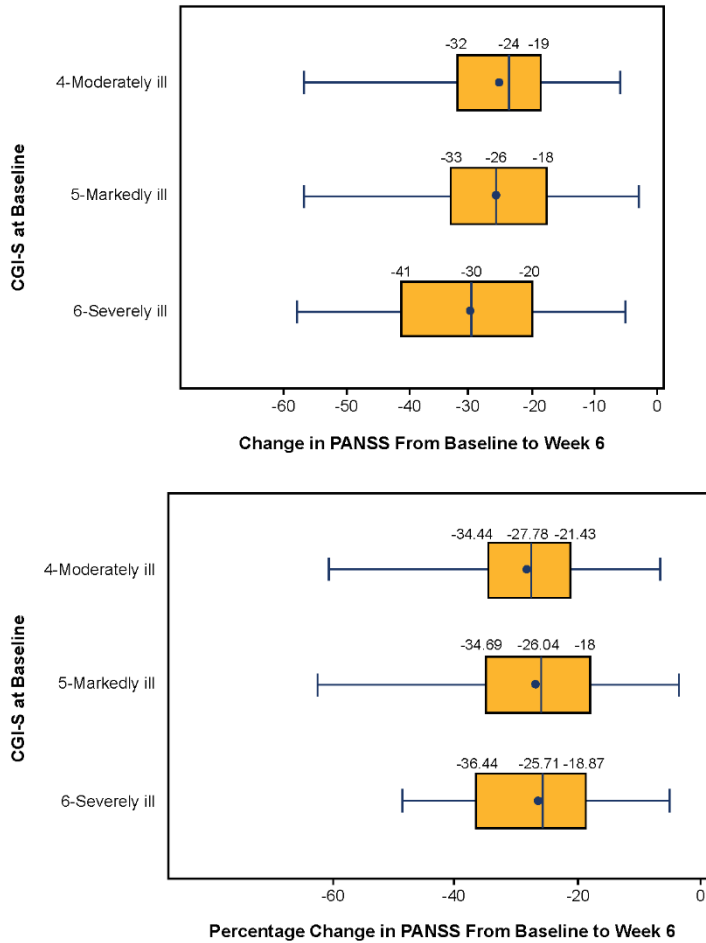

Box and whisker plots display the 25th (left edge of box), 50th (line inside box), and 75th (right edge of box) percentiles of the PANSS score distributions corresponding to each CGI-S level. Whiskers indicate scores  $\pm 1.5 \times$  interquartile range. Means are represented by dots. CGI-I, Clinician-Rated Clinical Global Impression-Improvement; CGI-S, Clinician-Rated Clinical Global Impression-Severity; PANSS, Positive and Negative Syndrome Scale.

**Supplementary Figure 5.** Meaningful regions of percentage change in PANSS total score (adjusted) corresponding to severity at baseline for responders (CGI-I=1, 2)

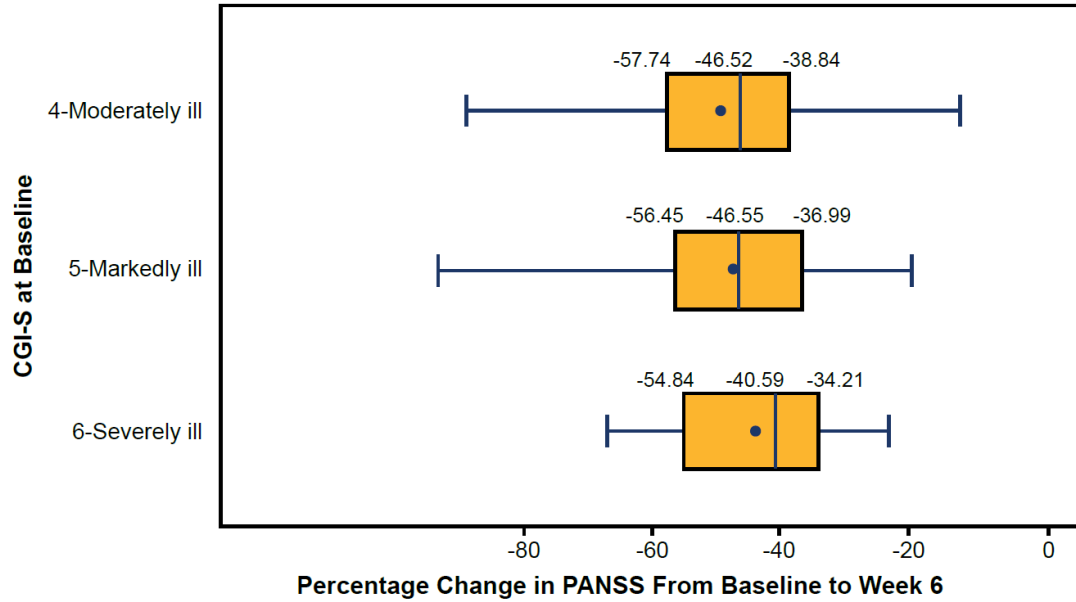

Box and whisker plots display the 25th (left edge of box), 50th (line inside box), and 75th (right edge of box) percentiles of the PANSS score distributions corresponding to each CGI-S level. Whiskers indicate scores  $\pm 1.5 \times$  interquartile range. Means are represented by dots.

CGI-I, Clinician-Rated Clinical Global Impression-Improvement; CGI-S, Clinician-Rated Clinical Global Impression-Severity; PANSS, Positive and Negative Syndrome Scale.
